# Supplementary material for: Revealing the role of Si vacancies and interfaces in SiHCl 3 dissociation applied in polysilicon
Source: Royal Society of Chemistry journal article supplement (doi:10.1039/d5cp01189b), 2025-01-01
Supplement: d5cp01189b2.pdf [file d5cp01189b2.pdf]

SYSTEM = name  
ENCUT = 400  
PREC = Medium  
EDIFF = 1E-5  
EDIFFG = -0.02  
VOSKOWN = 1  
ISPIN = 2  
ISYM = 1  
GGA = PE  
LREAL = Auto  
ISTART = 0  
ICHARG = 2  
ISMEAR = 0  
SIGMA = 0.2  
IBRION = 2  
ISIF = 2  
NSW = 500  
POTIM = 0.5  
NELMIN = 8  
NELM = 100  
ALGO = Fast  
LPLANE = TURE  
LWAVE = .FALSE.  
LCHARG = .FALSE.  
NPAR = 8
