# Supplementary material for: Revealing the role of Si vacancies and interfaces in SiHCl 3 dissociation applied in polysilicon
Source: Royal Society of Chemistry journal article supplement (doi:10.1039/d5cp01189b), 2025-01-01
Supplement: d5cp01189b3.pdf [file d5cp01189b3.pdf]

mesh auto

0

M

3 3 1

0 0 0
